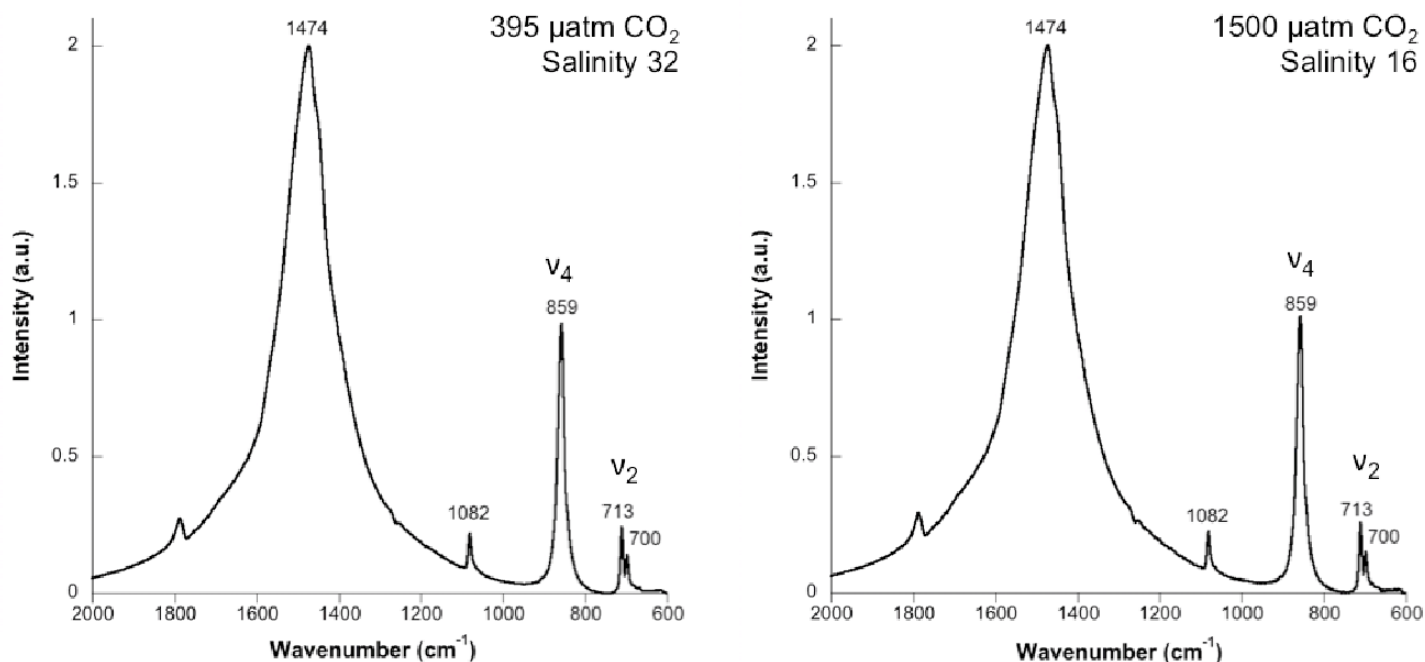

**Fig. S1.** Representative transmittance FTIR spectra of *Mercenaria mercenaria* shells after 21 weeks exposure to experimental conditions. Because no variation in peak position or intensity was observed among any of the experimental treatments, only spectra for the 395  $\mu\text{atm}$ , salinity 32 (left) and 1500  $\mu\text{atm}$ , salinity 16 (right) treatments are shown.

**Table S1.** Results of Pearson correlation test of  $M_{\text{ti}}$  versus  $M_{\text{sh}}$  at two latest time points (16 and 21 weeks of exposure) conducted for individual clams within each experimental treatment group

| Experimental group                  | Exposure time (weeks) | $R$         | $\sigma$ |
|-------------------------------------|-----------------------|-------------|----------|
| Sal 32, [CO <sub>2</sub> ] 395 ppm  | 16                    | <b>0.81</b> | 1.90E-06 |
| Sal 32, [CO <sub>2</sub> ] 800 ppm  | 16                    | <b>0.81</b> | 4.41E-06 |
| Sal 32, [CO <sub>2</sub> ] 1500 ppm | 16                    | <b>0.85</b> | 6.74E-08 |
| Sal 16, [CO <sub>2</sub> ] 395 ppm  | 16                    | 0.33        | 0.29107  |
| Sal 16, [CO <sub>2</sub> ] 800 ppm  | 16                    | <b>0.44</b> | 0.03608  |
| Sal 16, [CO <sub>2</sub> ] 1500 ppm | 16                    | 0.27        | 0.28251  |
| Sal 32, [CO <sub>2</sub> ] 395 ppm  | 21                    | -0.04       | 0.86218  |
| Sal 32, [CO <sub>2</sub> ] 800 ppm  | 21                    | <b>0.96</b> | 8.44E-14 |
| Sal 32, [CO <sub>2</sub> ] 1500 ppm | 21                    | <b>0.90</b> | 4.66E-15 |
| Sal 16, [CO <sub>2</sub> ] 395 ppm  | 21                    | <b>0.56</b> | 0.00876  |
| Sal 16, [CO <sub>2</sub> ] 800 ppm  | 21                    | <b>0.63</b> | 4.58E-04 |
| Sal 16, [CO <sub>2</sub> ] 1500 ppm | 21                    | 0.33        | 0.15065  |

Significant correlations ( $P < 0.05$ ) are shown in bold.

Table S2. Pearson correlation coefficients and the corresponding  $\sigma$  values for the experimental conditions and biological parameters of the clams

|                  |               | Exposure Time | Salinity    | pCO2         | Arg Saturation | shellmass  | tissuemass | Resp     |
|------------------|---------------|---------------|-------------|--------------|----------------|------------|------------|----------|
| "Exposure Time"  | Pearson Corr. | 1             | 1.83773E-16 | -1.35269E-17 | 4.17204E-17    | 0.037      | -0.17461   | 0.15595  |
|                  | Sig.          | --            | 1           | 1            | 1              | 0.84611    | 0.35609    | 0.46682  |
| "Salinity"       | Pearson Corr. | 1.83773E-16   | 1           | 2.94432E-17  | 0.73396*       | 0.64004*   | 0.50092*   | -0.26491 |
|                  | Sig.          | 1             | --          | 1            | 3.91646E-6     | 1.39588E-4 | 0.00481    | 0.21094  |
| "pCO2"           | Pearson Corr. | -1.35269E-17  | 2.94432E-17 | 1            | -0.57962*      | -0.09547   | 0.05438    | 0.02041  |
|                  | Sig.          | 1             | 1           | --           | 7.88718E-4     | 0.61578    | 0.77532    | 0.9246   |
| "Arg Saturation" | Pearson Corr. | 4.17204E-17   | 0.73396*    | -0.57962*    | 1              | 0.38754*   | 0.24605    | -0.14509 |
|                  | Sig.          | 1             | 3.91646E-6  | 7.88718E-4   | --             | 0.03435    | 0.18996    | 0.49876  |
| "shellmass"      | Pearson Corr. | 0.037         | 0.64004*    | -0.09547     | 0.38754*       | 1          | 0.62391*   | -0.37672 |
|                  | Sig.          | 0.84611       | 1.39588E-4  | 0.61578      | 0.03435        | --         | 2.29563E-4 | 0.06959  |
| "tissuemass"     | Pearson Corr. | -0.17461      | 0.50092*    | 0.05438      | 0.24605        | 0.62391*   | 1          | -0.18506 |
|                  | Sig.          | 0.35609       | 0.00481     | 0.77532      | 0.18996        | 2.29563E-4 | --         | 0.38665  |
| "Resp"           | Pearson Corr. | 0.15595       | -0.26491    | 0.02041      | -0.14509       | -0.37672   | -0.18506   | 1        |
|                  | Sig.          | 0.46682       | 0.21094     | 0.9246       | 0.49876        | 0.06959    | 0.38665    | --       |

2-tailed test of significance is used  
\*:Correlation is significant at the 0.05 level

Asterisks identify significant correlations.

Table S3. Pearson correlation coefficients and the corresponding  $\sigma$  values for the experimental conditions and biological parameters of the clams grown at salinity 32

|                  |               | Exposure Time | pCO2         | shellmass | tissuemass | Resp     | Arg Saturation |
|------------------|---------------|---------------|--------------|-----------|------------|----------|----------------|
| "Exposure Time"  | Pearson Corr. | 1             | -5.41075E-17 | -0.12916  | -0.53677*  | 0.32716  | 1.39625E-16    |
|                  | Sig.          | --            | 1            | 0.64641   | 0.03911    | 0.29926  | 1              |
| "pCO2"           | Pearson Corr. | -5.41075E-17  | 1            | -0.54752* | -0.16868   | 0.17644  | -0.91008*      |
|                  | Sig.          | 1             | --           | 0.03463   | 0.54788    | 0.58331  | 2.50354E-6     |
| "shellmass"      | Pearson Corr. | -0.12916      | -0.54752*    | 1         | 0.1878     | -0.42349 | 0.53995*       |
|                  | Sig.          | 0.64641       | 0.03463      | --        | 0.5027     | 0.17012  | 0.03774        |
| "tissuemass"     | Pearson Corr. | -0.53677*     | -0.16868     | 0.1878    | 1          | -0.26921 | 0.17773        |
|                  | Sig.          | 0.03911       | 0.54788      | 0.5027    | --         | 0.39749  | 0.52628        |
| "Resp"           | Pearson Corr. | 0.32716       | 0.17644      | -0.42349  | -0.26921   | 1        | -0.1208        |
|                  | Sig.          | 0.29926       | 0.58331      | 0.17012   | 0.39749    | --       | 0.70843        |
| "Arg Saturation" | Pearson Corr. | 1.39625E-16   | -0.91008*    | 0.53995*  | 0.17773    | -0.1208  | 1              |
|                  | Sig.          | 1             | 2.50354E-6   | 0.03774   | 0.52628    | 0.70843  | --             |

2-tailed test of significance is used  
\*:Correlation is significant at the 0.05 level

Asterisks identify significant correlations.

Table S4. Pearson correlation coefficients and the corresponding  $\sigma$  values for the experimental conditions and biological parameters of the clams grown at salinity 16

|                     |               | Exposure Time | pCO <sub>2</sub> | shellmass | tissuemass | Resp     | Arg Saturation |
|---------------------|---------------|---------------|------------------|-----------|------------|----------|----------------|
| "Exposure Time"     | Pearson Corr. | 1             | -5.41075E-17     | 0.20782   | 0.12214    | -0.20945 | 1.56696E-16    |
|                     | Sig.          | --            | 1                | 0.45734   | 0.66456    | 0.51354  | 1              |
| "pCO <sub>2</sub> " | Pearson Corr. | -5.41075E-17  | 1                | 0.25629   | 0.2867     | -0.37009 | -0.972*        |
|                     | Sig.          | 1             | --               | 0.35652   | 0.3002     | 0.23635  | 1.48072E-9     |
| "shellmass"         | Pearson Corr. | 0.20782       | 0.25629          | 1         | 0.69006*   | -0.09883 | -0.38207       |
|                     | Sig.          | 0.45734       | 0.35652          | --        | 0.00441    | 0.75993  | 0.15991        |
| "tissuemass"        | Pearson Corr. | 0.12214       | 0.2867           | 0.69006*  | 1          | 0.28327  | -0.35902       |
|                     | Sig.          | 0.66456       | 0.3002           | 0.00441   | --         | 0.37229  | 0.18878        |
| "Resp"              | Pearson Corr. | -0.20945      | -0.37009         | -0.09883  | 0.28327    | 1        | 0.3196         |
|                     | Sig.          | 0.51354       | 0.23635          | 0.75993   | 0.37229    | --       | 0.31122        |
| "Arg Saturation"    | Pearson Corr. | 1.56696E-16   | -0.972*          | -0.38207  | -0.35902   | 0.3196   | 1              |
|                     | Sig.          | 1             | 1.48072E-9       | 0.15991   | 0.18878    | 0.31122  | --             |

2-tailed test of significance is used

\*:Correlation is significant at the 0.05 level

Asterisks identify significant correlations.

Table S5. Principal component analysis for all parameters

| Parameter            | Coefficients of PC1 | Coefficients of PC2 | Coefficients of PC3 | Coefficients of PC4 | Coefficients of PC5 |
|----------------------|---------------------|---------------------|---------------------|---------------------|---------------------|
| Exposure time        | -0.13196            | <b>0.24594</b>      | <b>0.73981</b>      | -0.00886            | 0.09012             |
| Salinity             | <b>0.42971</b>      | -0.12826            | <b>0.30161</b>      | 0.16318             | <b>-0.51884</b>     |
| $P_{CO_2}$           | <b>-0.23407</b>     | <b>-0.55255</b>     | <b>0.22775</b>      | 0.08182             | <b>-0.27392</b>     |
| Aragonite saturation | <b>0.43541</b>      | <b>0.28835</b>      | 0.07309             | 0.12724             | <b>-0.4148</b>      |
| pH                   | <b>0.32002</b>      | <b>0.51596</b>      | -0.14429            | -0.02521            | 0.16471             |
| Mortality            | <b>-0.3627</b>      | <b>0.33353</b>      | <b>0.38615</b>      | -0.13791            | 0.05686             |
| Shell mass           | <b>0.39105</b>      | -0.16556            | <b>0.35215</b>      | -0.10242            | <b>0.36555</b>      |
| Tissue mass          | <b>0.34569</b>      | <b>-0.31737</b>     | 0.102               | <b>0.26307</b>      | <b>0.55383</b>      |
| SMR                  | <b>-0.21721</b>     | 0.17036             | -0.01273            | <b>0.92253</b>      | 0.06979             |

| Principal component | Eigenvalue | Percentage of variance (%) | Cumulative (%) |
|---------------------|------------|----------------------------|----------------|
| 1                   | 3.45974    | 38.44                      | 38.44          |
| 2                   | 2.22381    | 24.71                      | 63.15          |
| 3                   | 1.34317    | 14.92                      | 78.07          |
| 4                   | 0.88109    | 9.79                       | 87.86          |
| 5                   | 0.62364    | 6.93                       | 94.79          |

Loadings of principal components, eigenvalues and percentage of variance are given for each principal component.

Table S6. Principal component analysis without pH and aragonite saturation

|               | Coefficients of PC1 | Coefficients of PC2 | Coefficients of PC3 | Coefficients of PC4 | Coefficients of PC5 |
|---------------|---------------------|---------------------|---------------------|---------------------|---------------------|
| Exposure time | -0.23               | <b>0.76</b>         | 0.08                | 0.02                | 0.03                |
| $P_{CO_2}$    | 0.00                | -0.07               | <b>0.96</b>         | -0.26               | -0.05               |
| Salinity      | <b>0.45</b>         | <b>0.30</b>         | 0.05                | 0.12                | <b>-0.74</b>        |
| Mortality     | <b>-0.49</b>        | <b>0.40</b>         | 0.00                | -0.13               | 0.14                |
| Shell mass    | <b>0.45</b>         | <b>0.40</b>         | -0.05               | 0.00                | <b>0.21</b>         |
| Tissue mass   | <b>0.47</b>         | 0.08                | 0.18                | <b>0.30</b>         | <b>0.61</b>         |
| Resp          | <b>-0.29</b>        | -0.04               | <b>0.21</b>         | <b>0.90</b>         | -0.10               |

|   | Eigenvalue | Percentage of variance | Cumulative |
|---|------------|------------------------|------------|
| 1 | 2.90999    | 41.57%                 | 41.57%     |
| 2 | 1.34704    | 19.24%                 | 60.81%     |
| 3 | 1.02078    | 14.58%                 | 75.40%     |
| 4 | 0.85644    | 12.23%                 | 87.63%     |
| 5 | 0.47371    | 6.77%                  | 94.40%     |

Loadings of principal components, Eigenvalues and % of variance are given for each principal component.
